# Supplementary material
Source: PubMed Central journal article supplement (PMC6763987)

## Supplementary Online Content

Goyal N, Tsivgoulis G, Malhotra K, et al. Medical management vs mechanical thrombectomy for mild strokes: an international multicenter study and systematic review and meta-analysis. *JAMA Neurol*. Published online September 23, 2019. doi:10.1001/jamaneurol.2019.3112

**eMethods.** Search Strategy and Statistical Analysis

**eTable 1.** Percentage of missing variables in baseline characteristics and outcomes

**eTable 2.** Baseline Characteristics and outcomes between patients receiving treatment with mechanical thrombectomy and those receiving best medical management before and after the publication of mechanical thrombectomy trials.

**eTable 3.** Univariable and multivariable logistic regression analyses presenting the association of baseline characteristics with the likelihood of asymptomatic intracranial hemorrhage

**eTable 4.** Univariable and multivariable ordinal regression analyses

**eTable 5.** Univariable and multivariable ordinal regression analyses presenting the association of baseline characteristics with the likelihood of 3-month functional improvement

**eTable 6.** Baseline characteristics and outcomes of the propensity score matched population

**eTable 7.** Subgroup analyses comparing different outcomes between mechanical thrombectomy and best medical management stratified by location of occlusion

**eTable 8.** Subgroup analyses comparing different outcomes between mechanical thrombectomy and best medical management stratified by admission stroke severity

**eTable 9.** Excluded studies from the meta-analysis with specific reasons for exclusion

**eTable 10.** Assessment of risk of bias of included studies using the Newcastle-Ottawa Scale.

### eReferences

**eFigure 1.** Flow chart presenting the selection of eligible studies

**eFigure 2.** Forest plots on the unadjusted probability of 3-month favorable functional outcome

**eFigure 3.** Forest plots on the unadjusted probability of 3-month functional independence

**eFigure 4.** Forest plots on the unadjusted probability of all-cause 3-month mortality

**eFigure 5.** Forest plot on the unadjusted probability of symptomatic intracranial hemorrhage

**eFigure 6.** Forest plot on the unadjusted probability of asymptomatic intracranial hemorrhage

**eFigure 7.** Forest plot on the unadjusted probability of any intracranial hemorrhage

**eFigure 8.** Forest plots on the adjusted probability of 3-month favorable functional outcome (mRS-scores 0-1)

**eFigure 9.** Forest plots on the adjusted probability of 3-month functional independence (mRS-scores 0-2)

**eFigure 10.** Forest plots on the adjusted probability of all-cause 3-month mortality

**eFigure 11.** Forest plot on the adjusted probability of symptomatic intracranial hemorrhage

This supplementary material has been provided by the authors to give readers additional information about their work.

## **eMethods**

### **Complete MEDLINE search algorithm**

((endovascular[All Fields] AND ("therapy"[Subheading] OR "therapy"[All Fields] OR "treatment"[All Fields] OR "therapeutics"[MeSH Terms] OR "therapeutics"[All Fields])) OR (("thrombectomy"[MeSH Terms] OR "thrombectomy"[All Fields]) AND

("instrumentation"[Subheading] OR "instrumentation"[All Fields] OR "devices"[All Fields] OR "equipment and supplies"[MeSH Terms] OR ("equipment"[All Fields] AND "supplies"[All Fields]) OR "equipment and supplies"[All Fields])) OR (intra-arterial[All Fields] AND revascularization[All Fields]) OR (retrievable[All Fields] AND ("stents"[MeSH Terms] OR "stents"[All Fields])) AND ((emergent[All Fields] AND large[All Fields] AND ("blood vessels"[MeSH Terms] OR ("blood"[All Fields] AND "vessels"[All Fields]) OR "blood vessels"[All Fields] OR "vessel"[All Fields]) AND ("dental occlusion"[MeSH Terms] OR ("dental"[All Fields] AND "occlusion"[All Fields]) OR "dental occlusion"[All Fields] OR "occlusion"[All Fields])) OR (acute[All Fields] AND ("ischemia"[MeSH Terms] OR "ischemia"[All Fields] OR "ischemic"[All Fields]) AND ("stroke"[MeSH Terms] OR "stroke"[All Fields])) OR (proximal[All Fields] AND intracranial[All Fields] AND "occlusion"[All Fields]) OR "dental occlusion"[All Fields] OR "occlusion"[All Fields])) OR (anterior[All Fields] AND ("blood circulation"[MeSH Terms] OR ("blood"[All Fields] AND "circulation"[All Fields]) OR "blood circulation"[All Fields] OR "circulation"[All Fields])) AND ((low[All Fields] AND NIHSS[All Fields]) OR (mild[All Fields] AND ("stroke"[MeSH Terms] OR "stroke"[All Fields])) OR severity[All Fields])

### **Methods:**

The decision to offer MT or bMM for mild strokes with EVLO (NIHSS <6) was based on individual center's protocol and treating physicians' discretions. The tertiary stroke centers included in our study tended to offer MT on case to case basis depending on type of initial deficit, collateral status and presentation time window. The patients who were offered bMM received IVT when time from symptom onset to treatment was less

then 4 hours and 30 minutes. Otherwise antithrombotic medication was given based on treating physician's discretion. It was a common practice to monitor these patients in intensive care unit. In the endovascular arm, all patients received IVT prior to MT when time from symptom onset was below 4 hours 30 minutes and mELVO patients fulfilled eligibility criteria for IVT. Treating physicians performing MT in mELVO patients used stent retriever or catheter aspiration according to their discretion.

Procedural technical details/efficiency data included onset to groin puncture time, groin puncture to reperfusion time, and type of primary endovascular therapy (stent retriever or direct aspiration). Reperfusion was assessed using modified thrombolysis in cerebral Infarction (mTICI) scale, and successful reperfusion was defined as mTICI  $\geq 2$ . The reperfusion scales were obtained from the reports of endovascular specialists at different centers that were recorded during the endovascular procedures as part of the clinical duties of the interventionalists. There was no central adjudication of radiological outcomes.

### Statistical analysis

We compared the baseline characteristics and outcomes among AIS patients with mELVO treated with either MT or bMM. Continuous variables are presented as mean $\pm$ SD (normal distribution) and as median with interquartile range (skewed distribution). Categorical variables are presented as percentages with their corresponding 95% confidence intervals (CIs). Statistical comparisons between the 2

groups were performed using the  $\chi^2$  test or, in case of small expected frequencies, the Fisher exact test. Continuous variables were compared by the use of the unpaired t test or Mann-Whitney U-test, as indicated. The distribution of the 3-month mRS scores among the two groups was compared using the Cochran-Mantel Haenszel test and univariable/multivariable ordinal logistic regression (shift analysis). Univariable and multivariable binary logistic regression analyses were also used to evaluate the associations between baseline characteristics and safety or efficacy outcomes. In multivariable regression analysis we adjusted for a priori defined confounders of age, admission NIHSS-score, pretreatment with IVT, admission glucose, admission systolic blood pressure, collateral status and ASPECTS on baseline neuroimaging. We also performed alternative multivariable analyses using as confounders all baseline characteristics that contributed to the outcome of interest in the initial univariable analyses at p values <0.1. All baseline characteristics that contributed to the outcome of interest in the initial univariable analyses at p values <0.1 were included in the multivariable model as candidate variables. The final variables that were independently associated in the multivariable logistic regression analyses with the outcome of interest were selected using a p value <0.05. The goodness-of-fit of the multivariable regression models was assessed with the Pearson  $\chi^2$  statistic. We also performed ordinal regression analysis on discharge and 90-day functional outcome to identify independent predictors of functional improvement defined as 1-point decrease in the mRS-score in a shift analysis. To confirm the findings of the aforementioned regression models we performed additional sensitivity analyses on the outcomes of interest in propensity score matched (PSM) groups. Patients in the active group (MT treatment) were matched to control group patients (bMM) using a structured, iterative propensity score model with the primary objective to maximize the balance in the distribution of possible

confounders between the two aforementioned groups. In the PSM algorithm we included all baseline characteristics, except for treatment modality (MT vs. bMM), and calculated the corresponding propensity score of MT treatment for each subject. A nearest neighbor matching algorithm was then used to match patients receiving MT treatment to patients receiving bMM on a 1:1 ratio (with no replacement) within  $0.2 \times \text{SD}$  of the logit of the propensity score. To determine whether PSM achieved balance in all potential confounders, we compared all baseline characteristics of patients receiving MT treatment to their PSM counterparts.

Sensitivity analyses involved the use of both regression-based multiple imputation and last-observation carried forward (LOCF) imputation of missing three-month follow-up evaluations. We also conducted additional subgroup analyses stratified by location of occlusion (proximal vs. distal) and baseline stroke severity (4-5 points in NIHSS-score vs. 0-3 points) to investigate for potential heterogeneity on the outcomes of interest between the two treatment groups.

In our meta-analysis we calculated relative odds ratios (OR) and their corresponding 95% confidence intervals (CI) to measure the effect size of all the outcomes. We also performed sensitivity analyses according to the status of three-month follow-up evaluations after excluding patients with missing 3-month mRS-scores. We additionally performed adjusted analyses for those studies that provided OR of MT vs. bMM after adjusting for confounding variables. For the qualitative interpretation of heterogeneity,  $I^2 > 50\%$  and  $I^2 > 75\%$  indicated substantial and considerable heterogeneity, respectively. We performed equivalent z test for each pooled OR, and a two-tailed p value  $< 0.05$  was considered statistically significant. We also performed sensitivity analysis by excluding the patient who were lost to follow up to effectively compare our retrospective cohort with the findings of metanalysis. All

statistical analyses were conducted using Cochrane Collaboration's Review Manager Software Package (RevMan 5.3) and the Stata Statistical Software Release 13 (College Station, TX, StataCorp LP).

### **Supplementary Tables**

eTable 1. Percentage of missing variables in baseline characteristics and outcomes

| <b>Baseline Characteristics</b> | <b>Mechanical Thrombectomy (n=138)</b> | <b>Best Medical Management (n=113)</b> |
|---------------------------------|----------------------------------------|----------------------------------------|
| Age                             | 0%                                     | 0%                                     |
| Females (%)                     | 0%                                     | 0%                                     |
| Hypertension (%)                | 0%                                     | 0%                                     |
| Diabetes Mellitus (%)           | 2.2%                                   | 0.9%                                   |
| Hyperlipidemia (%)              | 0%                                     | 0%                                     |
| Atrial fibrillation (%)         | 1.4%                                   | 0%                                     |
| Coronary artery disease (%)     | 0%                                     | 0%                                     |
| Congestive heart failure (%)    | 12.3%                                  | 0%                                     |
| End-stage renal disease (%)     | 8.7%                                   | 1.8%                                   |
| Current smoking (%)             | 0%                                     | 0.9%                                   |
| Admission Glucose               | 3.6%                                   | 1.8%                                   |
| Admission SBP                   | 15.9%                                  | 4.4%                                   |
| Admission DBP                   | 16.7%                                  | 5.3%                                   |
| Antiplatelet pretreatment       | 4.3%                                   | 0%                                     |
| Anticoagulant pretreatment      | 8.0%                                   | 0.9%                                   |
| NIHSS admission                 | 0%                                     | 0%                                     |
| ASPECTS admission               | 29.7%                                  | 33.6%                                  |
| Good collaterals on CTA         | 28.3%                                  | 46.0%                                  |
| IVtPA                           | 0.7%                                   | 0%                                     |
| Onset-to-tPA*                   | 10.8%                                  | 8.5%                                   |
| Occlusion location              | 0%                                     | 0%                                     |
|                                 |                                        |                                        |
| <u>Outcomes</u>                 |                                        |                                        |
| Length of Hospital stay         | 0%                                     | 0%                                     |
| Length of ICU stay**            | 0%                                     | 0%                                     |
| Successful reperfusion          | 0%                                     | -                                      |
| Asymptomatic ICH                | 0.7%                                   | 3.5%                                   |
| Symptomatic ICH                 | 0.7%                                   | 5.3%                                   |
| Discharge NIHSS                 | 15.0%                                  | 14.5%                                  |
| Discharge mRS                   | 8.0%                                   | 1.8%                                   |
| 3 month mRS                     | 3.6%                                   | 22.1%                                  |
| 3-month FFO                     | 3.6%                                   | 22.1%                                  |
| 3-month FI                      | 3.6%                                   | 22.1%                                  |
| 3-month Mortality               | 3.6%                                   | 22.1%                                  |

\* among patients treated with intravenous thrombolysis

\*\* among patients admitted to the ICU

ICU: intensive care unit; ICH: Intracranial hemorrhage; mRS: modified Rankin Scale score; FFO: favorable functional outcome defined as modified Rankin Stroke scale scores of 0-1 at 3 months; FI: functional independence defined as modified Rankin Stroke scale scores of 0-2 at 3 months



eTable 2. Baseline Characteristics and outcomes between patients receiving treatment with mechanical thrombectomy and those receiving best medical management before and after the publication of mechanical thrombectomy trials.

| Baseline Characteristics     | Until June 2015                |                                |         | Following June 2015             |                                |         |
|------------------------------|--------------------------------|--------------------------------|---------|---------------------------------|--------------------------------|---------|
|                              | Mechanical thrombectomy (n=35) | Best medical management (n=31) | p-value | Mechanical thrombectomy (n=103) | Best medical management (n=82) | p-value |
| Age                          | 62.2±16.7                      | 63.9±12.9                      | 0.642   | 66.2±16.6                       | 65.2±12.8                      | 0.645   |
| Females (%)                  | 48.6%                          | 48.4%                          | 0.988   | 46.6%                           | 43.9%                          | 0.714   |
| Hypertension (%)             | 68.5%                          | 77.4%                          | 0.420   | 76.7%                           | 68.3%                          | 0.201   |
| Diabetes Mellitus (%)        | 28.6%                          | 22.6%                          | 0.579   | 29.0%                           | 27.2%                          | 0.784   |
| Hyperlipidemia (%)           | 34.2%                          | 58.1%                          | 0.053   | 52.4%                           | 43.9%                          | 0.249   |
| Atrial fibrillation (%)      | 28.6%                          | 22.6%                          | 0.579   | 29.7%                           | 20.7%                          | 0.167   |
| Coronary artery disease (%)  | 17.1%                          | 32.2%                          | 0.153   | 17.4%                           | 25.6%                          | 0.178   |
| Congestive heart failure (%) | 16.1%                          | 12.9%                          | 0.718   | 10.0%                           | 13.4%                          | 0.485   |
| End-stage renal disease (%)  | 9.1%                           | 0%                             | 0.085   | 4.3%                            | 2.5%                           | 0.519   |
| Current smoking (%)          | 20.0%                          | 33.3%                          | 0.223   | 28.1%                           | 42.7%                          | 0.039   |
| Admission Glucose            | 122.7±37.8                     | 131.0±76.8                     | 0.587   | 128.0±47.0                      | 138.5±59.0                     | 0.182   |
| Admission SBP                | 144.8±21.3                     | 153.2±25.8                     | 0.192   | 148.8±22.9                      | 145.9±32.6                     | 0.495   |
| Admission DBP                | 82.0±13.2                      | 83.0±23.1                      | 0.840   | 83.7±14.8                       | 82.6±19.4                      | 0.681   |
| Antiplatelet pretreatment    | 53.1%                          | 48.4%                          | 0.707   | 50.0%                           | 36.6%                          | 0.070   |
| Anticoagulant pretreatment   | 31.2%                          | 13.3%                          | 0.092   | 13.7%                           | 13.4%                          | 0.958   |
| NIHSS admission              | 4 (3-5)                        | 3 (2-4)                        | 0.278   | 4 (3-5)                         | 3 (2-4)                        | <0.001  |
| ASPECTS admission            | 10 (9-10)                      | 9 (8-10)                       | 0.073   | 10 (8-10)                       | 10 (9-10)                      | 0.633   |

|                         |            |            |       |            |            |       |
|-------------------------|------------|------------|-------|------------|------------|-------|
| Good collaterals on CTA | 87.5%      | 88.9%      | 0.891 | 80.0%      | 76.7%      | 0.677 |
| IVtPA                   | 54.2%      | 41.9%      | 0.316 | 53.9%      | 41.5%      | 0.093 |
| Onset-to-tPA*           | 144.3±74.0 | 113.4±43.1 | 0.201 | 129.8±64.3 | 134.3±57.3 | 0.752 |
| Proximal Occlusion      | 74.3%      | 64.5%      | 0.389 | 75.7%      | 58.5%      | 0.013 |
|                         |            |            |       |            |            |       |
| <u>Outcomes</u>         |            |            |       |            |            |       |
| Length of Hospital stay | 6 (3-11)   | 4 (3-6)    | 0.050 | 5 (4-9)    | 5 (3-8)    | 0.017 |
| Length of ICU stay**    | 3 (2-5)    | 3 (0-4)    | 0.230 | 2 (1-3)    | 3 (1-4)    | 0.053 |
| Successful reperfusion  | 82.9%      | -          | -     | 85.4%      | -          | -     |
| Asymptomatic ICH        | 14.2%      | 3.2%       | 0.119 | 18.6%      | 5.1%       | 0.007 |
| Symptomatic ICH         | 5.7%       | 0%         | 0.183 | 3.9%       | 1.3%       | 0.292 |
| Discharge mRS           | 1 (0-2)    | 1 (0-2)    | 0.258 | 1 (1-3)    | 1 (0-2)    | 0.003 |
| 3 month mRS             | 1 (0-2)    | 1 (0-2)    | 0.394 | 1 (0-2)    | 1 (0-2)    | 0.137 |
| 3-month FFO             | 73.5%      | 73.1%      | 0.969 | 59.6%      | 69.4%      | 0.211 |
| 3-month FI              | 79.4%      | 84.6%      | 0.606 | 75.7%      | 85.4%      | 0.137 |
| 3-month Mortality       | 11.8%      | 3.8%       | 0.271 | 9.1%       | 6.4%       | 0.550 |

\* Collateral score (CS) for anterior circulation ELVO were reported in a dichotomized fashion (ie, poor (CS = 0, 1) vs good (CS = 2, 3 and 4)) using ASITN methodology that has been shown to predict outcomes.

\*\*Internal carotid artery, M1 middle cerebral artery

NA: not applicable

ICU: intensive care unit

ICH: Intracranial hemorrhage

mRS: modified Rankin Scale score

FFO: favorable functional outcome defined as modified Rankin Stroke scale scores of 0-1 at 3 months

FI: functional independence defined as modified Rankin Stroke scale scores of 0-2 at 3 months

eTable 3. Univariable and multivariable logistic regression analyses presenting the association of baseline characteristics with the likelihood of asymptomatic intracranial hemorrhage

| Characteristic             | Univariable analysis |         | Multivariable analysis |         |
|----------------------------|----------------------|---------|------------------------|---------|
|                            | Odds Ratio (95%CI)   | p-value | Odds Ratio (95%CI)     | p-value |
| Age                        | 1.02 (0.99, 1.05)    | 0.183   | -                      | -       |
| Female gender              | 0.57 (0.25, 1.29)    | 0.177   | -                      | -       |
| Hypertension               | 1.92 (0.70, 5.26)    | 0.204   | -                      | -       |
| Diabetes Mellitus          | 0.70 (0.27, 1.83)    | 0.473   | -                      | -       |
| Hyperlipidemia             | 0.75 (0.34, 1.65)    | 0.479   | -                      | -       |
| Atrial fibrillation        | 1.65 (0.72, 3.77)    | 0.235   | -                      | -       |
| Coronary artery disease    | 1.18 (0.47, 2.94)    | 0.718   | -                      | -       |
| Congestive heart failure   | 1.77 (0.61, 5.15)    | 0.290   | -                      | -       |
| End-stage renal disease    | 4.14 (0.97, 17.65)   | 0.054   | 3.28 (0.74, 14.55)     | 0.118   |
| Current smoking            | 0.79 (0.33, 1.88)    | 0.601   | -                      | -       |
| Admission Glucose          | 1.00 (0.99, 1.01)    | 0.149   | -                      | -       |
| Admission SBP              | 1.00 (0.98, 1.01)    | 0.611   | -                      | -       |
| Admission DBP              | 0.99 (0.97, 1.02)    | 0.621   | -                      | -       |
| Antiplatelet pretreatment  | 0.96 (0.60, 1.52)    | 0.851   | -                      | -       |
| Anticoagulant pretreatment | 0.96 (0.51, 1.82)    | 0.905   | -                      | -       |
| NIHSS-score admission      | 1.27 (0.95, 1.69)    | 0.105   | -                      | -       |
| ASPECTS admission          | 1.10 (0.71, 1.72)    | 0.661   | -                      | -       |
| Good collaterals on CTA    | 1.55 (0.43, 5.64)    | 0.502   | -                      | -       |
| Intravenous thrombolysis   | 1.79 (0.81, 3.98)    | 0.150   | -                      | -       |
| Onset to tPA-bolus time    | 1.00 (0.99, 1.01)    | 0.960   | -                      | -       |
| Proximal occlusion         | 1.04 (0.45, 2.39)    | 0.934   | -                      | -       |
| MT (vs. bMM)               | 4.42 (1.62, 12.00)   | 0.004   | 4.13 (1.50, 11.40)     | 0.006   |

SBP: systolic blood pressure

DBP: diastolic blood pressure

NIHSS: National Institute of Health Stroke Scale

ASPECTS: Alberta Stroke Program Early CT Score

tPA: tissue plasminogen activator

MT: mechanical thrombectomy

bMM: best medical management

eTable 4. Univariable and multivariable ordinal regression analyses presenting the association of baseline characteristics with the likelihood of 3-month functional independence (mRS-scores of 0-2). Patients with missing three-month follow-up evaluations were included in this analysis using last-observation carried forward methodology.

| Characteristic            | Univariable analysis      |         | Multivariable analysis    |         |
|---------------------------|---------------------------|---------|---------------------------|---------|
|                           | common Odds Ratio (95%CI) | p-value | common Odds Ratio (95%CI) | p-value |
| Age                       | 0.96 (0.94, 0.98)         | 0.002   | 0.96 (0.93, 0.99)         | 0.007   |
| Female gender             | 0.74 (0.38, 1.41)         | 0.359   | -                         | -       |
| Hypertension              | 0.54 (0.24, 1.23)         | 0.143   | -                         | -       |
| Diabetes Mellitus         | 0.67 (0.33, 1.35)         | 0.262   | -                         | -       |
| Hyperlipidemia            | 1.24 (0.64, 2.39)         | 0.518   | -                         | -       |
| Atrial fibrillation       | 0.54 (0.27, 1.08)         | 0.081   | 1.10 (0.44, 2.68)         | 0.847   |
| Coronary artery disease   | 0.52 (0.25, 1.06)         | 0.073   | 0.55 (0.22, 1.34)         | 0.191   |
| Congestive heart failure  | 0.61 (0.24, 1.54)         | 0.291   | -                         | -       |
| End-stage renal disease   | 0.70 (0.14, 3.52)         | 0.669   | -                         | -       |
| Current smoking           | 1.04 (0.52, 2.09)         | 0.912   | -                         | -       |
| Admission Glucose         | 1.00 (0.99, 1.01)         | 0.363   | -                         | -       |
| Admission SBP             | 0.99 (0.97, 1.00)         | 0.050   | 0.99 (0.97, 1.01)         | 0.124   |
| Admission DBP             | 1.00 (0.98, 1.02)         | 0.741   | -                         | -       |
| Antiplatelet pretreatment | 0.86 (0.61, 1.20)         | 0.372   | -                         | -       |

|                            |                   |       |                   |       |
|----------------------------|-------------------|-------|-------------------|-------|
| Anticoagulant pretreatment | 0.83 (0.54, 1.28) | 0.401 | -                 | -     |
| NIHSS admission            | 0.75 (0.58, 0.96) | 0.021 | 0.75 (0.57, 0.99) | 0.048 |
| ASPECTS admission          | 1.26 (0.95, 1.67) | 0.108 | -                 | -     |
| Good collaterals on CTA    | 1.76 (0.66, 4.68) | 0.255 | -                 | -     |
| Intravenous thrombolysis   | 2.07 (1.05, 4.09) | 0.036 | 2.48 (1.12, 5.48) | 0.025 |
| Onset to tPA-bolus time    | 1.00 (0.99, 1.01) | 0.379 | -                 | -     |
| Proximal occlusion         | 1.01 (0.50, 2.04) | 0.973 | -                 | -     |
| MT (vs. bMM)               | 0.44 (0.22, 0.90) | 0.024 | 0.42 (0.18, 0.96) | 0.040 |

SBP: systolic blood pressure

DBP: diastolic blood pressure

NIHSS: National Institute of Health Stroke Scale

ASPECTS: Alberta Stroke Program Early CT Score

tPA: tissue plasminogen activator

MT: mechanical thrombectomy

bMM: best medical management

eTable 5. Univariable and multivariable ordinal regression analyses presenting the association of baseline characteristics with the likelihood of 3-month functional improvement defined as 1-point decrease in modified Rankin Scale scores at three months (shift analysis). Patients with missing three-month follow-up evaluations were included in this analysis using last-observation carried forward methodology.

| Characteristic    | Univariable analysis |         | Multivariable analysis |         |
|-------------------|----------------------|---------|------------------------|---------|
|                   | Odds Ratio (95% CI)  | p-value | Odds Ratio (95% CI)    | p-value |
| Age               | 0.98 (0.96, 0.99)    | 0.001   | 0.97 (0.95, 0.99)      | 0.007   |
| Female gender     | 1.13 (0.72, 1.78)    | 0.584   | -                      | -       |
| Hypertension      | 0.84 (0.51, 1.39)    | 0.501   | -                      | -       |
| Diabetes Mellitus | 0.95 (0.57, 1.59)    | 0.851   | -                      | -       |

|                            |                   |       |                   |       |
|----------------------------|-------------------|-------|-------------------|-------|
| Hyperlipidemia             | 1.06 (0.67, 1.67) | 0.803 | -                 | -     |
| Atrial fibrillation        | 0.57 (0.34, 0.97) | 0.037 | 1.10 (0.53, 2.27) | 0.795 |
| Coronary artery disease    | 0.65 (0.38, 1.12) | 0.126 | -                 | -     |
| Congestive heart failure   | 0.74 (0.36, 1.54) | 0.419 | -                 | -     |
| End-stage renal disease    | 1.82 (0.48, 6.67) | 0.378 | -                 | -     |
| Current smoking            | 0.94 (0.58, 1.51) | 0.808 | -                 | -     |
| Admission Glucose          | 1.00 (0.99, 1.01) | 0.338 | -                 | -     |
| Admission SBP              | 1.00 (0.99, 1.01) | 0.051 | 0.99 (0.98, 1.01) | 0.277 |
| Admission DBP              | 1.00 (0.98, 1.01) | 0.763 | -                 | -     |
| Antiplatelet pretreatment  | 1.07 (0.81, 1.41) | 0.611 | -                 | -     |
| Anticoagulant pretreatment | 0.82 (0.58, 1.15) | 0.241 | -                 | -     |
| NIHSS admission            | 0.84 (0.72, 0.98) | 0.028 | 0.81 (0.65, 1.01) | 0.061 |
| ASPECTS admission          | 1.22 (0.98, 1.51) | 0.070 | 1.25 (0.98, 1.59) | 0.072 |
| Good collaterals on CTA    | 1.45 (0.69, 3.03) | 0.332 | -                 | -     |
| Intravenous thrombolysis   | 1.75 (1.11, 2.78) | 0.016 | 1.81 (0.96, 3.45) | 0.067 |
| Onset to tPA-bolus time    | 1.00 (0.99, 1.01) | 0.248 | -                 | -     |
| Proximal occlusion         | 1.39 (0.86, 2.27) | 0.174 | -                 | -     |
| MT (vs. bMM)               | 0.79 (0.51, 1.25) | 0.312 | -                 | -     |

SBP: systolic blood pressure

DBP: diastolic blood pressure

NIHSS: National Institute of Health Stroke Scale

ASPECTS: Alberta Stroke Program Early CT Score

tPA: tissue plasminogen activator

MT: mechanical thrombectomy

bMM: best medical management

eTable 6. Baseline characteristics and outcomes of the propensity score matched population

|                                    | <b>Mechanical Thrombectomy (n=94)</b> | <b>Best Medical Management (n=94)</b> | <b>P value</b> |
|------------------------------------|---------------------------------------|---------------------------------------|----------------|
| <b>Baseline Characteristics</b>    |                                       |                                       |                |
| Age                                | 63.5±16.6                             | 63.6±13.6                             | 0.950          |
| Females (%)                        | 50.0%                                 | 40.3%                                 | 0.187          |
| Hypertension (%)                   | 70.2%                                 | 73.4%                                 | 0.627          |
| Diabetes Mellitus (%)              | 26.4%                                 | 25.5%                                 | 0.896          |
| Hyperlipidemia (%)                 | 43.6%                                 | 49.5%                                 | 0.423          |
| Atrial fibrillation (%)            | 30.1%                                 | 24.5%                                 | 0.387          |
| Coronary artery disease (%)        | 16.0%                                 | 23.4%                                 | 0.199          |
| Congestive heart failure (%)       | 10.2%                                 | 13.8%                                 | 0.456          |
| End-stage renal disease (%)        | 5.7%                                  | 2.2%                                  | 0.218          |
| Current smoking (%)                | 26.6%                                 | 37.2%                                 | 0.118          |
| Admission Glucose                  | 128.3±47.9                            | 127.8±50.8                            | 0.945          |
| Admission SBP                      | 143.9±24.2                            | 147.2±29.7                            | 0.410          |
| Admission DBP                      | 81.4±13.8                             | 82.2±20.7                             | 0.762          |
| Antiplatelet pretreatment          | 56.3%                                 | 56.9%                                 | 0.941          |
| Anticoagulant pretreatment         | 26.4%                                 | 14.9%                                 | 0.053          |
| NIHSS admission                    | 3 (2-4)                               | 3 (2-4)                               | 0.586          |
| ASPECTS admission                  | 10 (9-10)                             | 10 (9-10)                             | 0.669          |
| Good collaterals on CTA*           | 78.8%                                 | 76.5%                                 | 0.782          |
| IVtPA                              | 52.1%                                 | 50.0%                                 | 0.770          |
| Onset-to-tPA                       | 124.2±78.5                            | 120.0±53.7                            | 0.772          |
| Onset-to-groin puncture time       | 225 (160-436)                         | -                                     | -              |
| Groin puncture-to-reperfusion time | 42 (28-67)                            | -                                     | -              |
| Extracranial ICA                   | 9.6%                                  | 19.1%                                 | NA             |
| Intracranial ICA                   | 8.5%                                  | 7.4%                                  | NA             |
| M1-MCA                             | 42.5%                                 | 31.9%                                 | NA             |
| M2-MCA                             | 33.0%                                 | 24.4%                                 | NA             |
| Proximal occlusion**               | 62.8%                                 | 60.6%                                 | 0.764          |
| Tandem occlusion                   | 5.3%                                  | 1.1%                                  | 0.097          |
| <b>Outcomes</b>                    |                                       |                                       |                |
| Length of Hospital stay            | 5 (4-9)                               | 4 (3-7)                               | 0.005          |
| Length of ICU stay                 | 2 (1-4)                               | 2 (0-3)                               | 0.231          |
| Successful reperfusion             | 83.0%                                 | -                                     | -              |
| Asymptomatic ICH                   | 22.6%                                 | 3.3%                                  | <0.001         |
| Symptomatic ICH                    | 3.2%                                  | 2.2%                                  | 0.677          |
| Discharge NIHSS                    | 1 (0-4)                               | 1 (0-3)                               | 0.984          |



|                                                    |         |         |       |
|----------------------------------------------------|---------|---------|-------|
| Neurological improvement during Hospitalization*** | 2 (0-3) | 1 (0-3) | 0.987 |
| Discharge mRS#                                     | 1 (0-3) | 1 (1-2) | 0.356 |
| 3 month mRS#                                       | 1 (0-2) | 1 (0-2) | 0.764 |
| 3-month FFO                                        | 69.0%   | 65.6%   | 0.659 |
| 3-month FI                                         | 80.9%   | 82.0%   | 0.877 |
| 3-month Mortality                                  | 11.9%   | 8.2%    | 0.469 |

\* Collateral score (CS) for anterior circulation ELVO were reported in a dichotomized fashion (ie, poor (CS = 0, 1) vs good (CS = 2, 3 and 4)) using ASITN methodology that has been shown to predict outcomes.[20]

\*\*Internal carotid artery, M1 middle cerebral artery

\*\*\* decrease in the baseline NIHSS score at hospital discharge (baseline NIHSS-score–discharge NIHSS-score)

#Statistical comparisons were performed using Cochran-Mantel Haenszel test

NA: not applicable

ICU: intensive care unit

ICH: Intracranial hemorrhage

mRS: modified Rankin Scale score

FFO: favorable functional outcome defined as modified Rankin Stroke scale scores of 0-1 at 3 months

FI: functional independence defined as modified Rankin Stroke scale scores of 0-2 at 3 months

eTable 7. Subgroup analyses comparing different outcomes between mechanical thrombectomy and best medical management stratified by location of occlusion

| Location of occlusion        | Mechanical thrombectomy | Best medical management | P value |
|------------------------------|-------------------------|-------------------------|---------|
| Proximal occlusions* (n=173) |                         |                         |         |
| Symptomatic ICH, %           | 4.9%                    | 1.6%                    | 0.410   |
| Asymptomatic ICH, %          | 16.5%                   | 4.6%                    | 0.026   |
| 3-month FFO, %               | 67.0%                   | 69.1%                   | 0.790   |
| 3-month FI                   | 78%                     | 85.5%                   | 0.295   |
| 3-month mortality, %         | 7%                      | 5.5%                    | >0.999  |
| Distal occlusions** (n=78)   |                         |                         |         |
| Symptomatic ICH, %           | 2.9%                    | 0%                      | 0.436   |
| Asymptomatic ICH, %          | 20.6%                   | 4.5%                    | 0.036   |
| 3-month FFO, %               | 51.5%                   | 72.7%                   | 0.076   |
| 3-month FI                   | 72.7%                   | 84.8%                   | 0.367   |
| 3-month mortality, %         | 18.2%                   | 6.1%                    | 0.258   |

ICH: intracranial hemorrhage; FFO: favorable functional outcome (mRS-scores of 0-1)

\*Internal carotid artery, M1 middle cerebral artery

\*\*M2 middle cerebral artery

eTable 8. Subgroup analyses comparing different outcomes between mechanical thrombectomy and best medical management stratified by admission stroke severity

| Admission Stroke Severity         | Mechanical thrombectomy | Best medical management | P value |
|-----------------------------------|-------------------------|-------------------------|---------|
| NIHSS-score 0-3 points<br>(n=117) |                         |                         |         |
| Symptomatic ICH, %                | 3.8%                    | 1.6%                    | 0.591   |
| Asymptomatic ICH, %               | 15.4%                   | 4.7%                    | 0.062   |
| 3-month FFO, %                    | 67.3%                   | 75.5%                   | 0.363   |
| 3-month FI                        | 83.7%                   | 88.7%                   | 0.569   |
| 3-month mortality, %              | 12.2%                   | 3.8%                    | 0.149   |
| NIHSS-score 4-5 points<br>(n=134) |                         |                         |         |
| Symptomatic ICH, %                | 4.7%                    | 0%                      | 0.298   |
| Asymptomatic ICH, %               | 18.8%                   | 4.2%                    | 0.031   |
| 3-month FFO, %                    | 60.7%                   | 62.8%                   | 0.827   |
| 3-month FI                        | 72.6%                   | 80%                     | 0.491   |
| 3-month mortality, %              | 8.3%                    | 8.6%                    | >0.999  |

ICH: intracranial hemorrhage; FFO: favorable functional outcome (mRS-scores of 0-1); FI: functional independence (mRS-scores of 0-1)

eTable 9. Excluded studies from the meta-analysis with specific reasons for exclusion

| <b>Study Name</b>          | <b>Reasons for exclusion</b>                        |
|----------------------------|-----------------------------------------------------|
| Dargazanli et al, 2017 [1] | Different NIHSS cut-off                             |
| Haussen et al, 2017 [2]    | Overlapping data with the study of Nagel et al [5]  |
| Haussen et al, 2018 [3]    | Overlapping data with the study of Nagel et al [5]  |
| Messer et al, 2017 [4]     | Overlapping data with the study of Sarraj et al [6] |

NIHSS: National Institutes of Health Stroke Scale

eTable 10. Assessment of risk of bias of included studies using the Newcastle-Ottawa Scale.

| Study name       | Selection | Comparability | Outcome | Overall score |
|------------------|-----------|---------------|---------|---------------|
| Goyal et al      | ****      | **            | **      | 8/9           |
| Nagel et al [5]  | ****      | **            | ***     | 9/9           |
| Sarraj et al [6] | ****      | **            | ***     | 9/9           |
| Urta et al [7]   | ****      | *             | **      | 7/9           |
| Total            | 16/16     | 7/8           | 10/12   | 33/36         |

## Supplementary References

1. Dargazanli C, Arquizan C, Gory B, Consoli A, Labreuche J, Redjem H, et al. Mechanical Thrombectomy for Minor and Mild Stroke Patients Harboring Large Vessel Occlusion in the Anterior Circulation: A Multicenter Cohort Study. *Stroke*. 2017;48:3274-3281.
2. Haussen DC, Bousslama M, Grossberg JA, Anderson A, Belagage S, Frankel M, et al. Too good to intervene? Thrombectomy for large vessel occlusion strokes with minimal symptoms: an intention-to-treat analysis. *J Neurointerv Surg*. 2017;9:917-921.
3. Haussen DC, Lima FO, Bousslama M, Grossberg JA, Silva GS, Lev MH, et al. Thrombectomy versus medical management for large vessel occlusion strokes with minimal symptoms: an analysis from STOPStroke and GESTOR cohorts. *J Neurointerv Surg*. 2018;10:325-329.
4. Messer MP, Schönenberger S, Möhlenbruch MA, Pfaff J, Herweh C, Ringleb PA, Nagel S. Minor Stroke Syndromes in Large-Vessel Occlusions: Mechanical Thrombectomy or Thrombolysis Only? *AJNR Am J Neuroradiol*. 2017;38:1177-1179.
5. Nagel S, Bousslama M, Krause LU, et al. Mechanical Thrombectomy in Patients With Milder Strokes and Large Vessel Occlusions. *Stroke*. 2018;49:2391-2397.
6. Sarraj A, Hassan A, Savitz SI, et al. Endovascular Thrombectomy for Mild Strokes: How Low Should We Go? *Stroke*. 2018 Oct;49(10):2398-2405
7. Urra X, San Román L, Gil F, Millán M, Cánovas D, Roquer J, et al; Catalan Stroke Code and Reperfusion Consortium (Cat-SCR). Medical and endovascular treatment of patients with large vessel occlusion presenting with mild symptoms: an observational multicenter study. *Cerebrovasc Dis*. 2014;38:418-424.

## Supplementary Figures

**Figure 1.** Flow chart presenting the selection of eligible studies

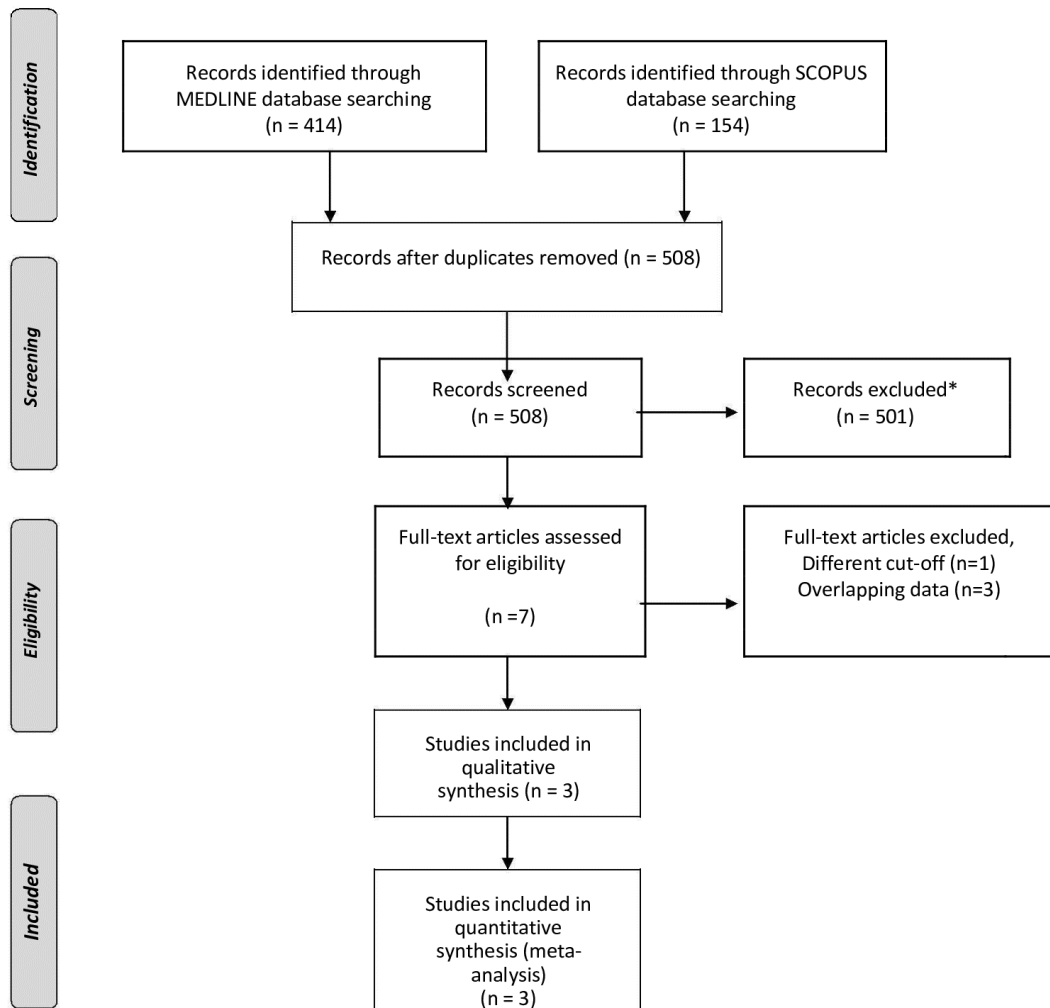

**eFigure 2.** Forest plots on the unadjusted probability of 3-month favorable functional outcome (mRS-scores 0-1) in patients with large vessel occlusion and mild neurological severity treated with mechanical thrombectomy compared to patients receiving best medical management.

(A) Without last-observation carried forward

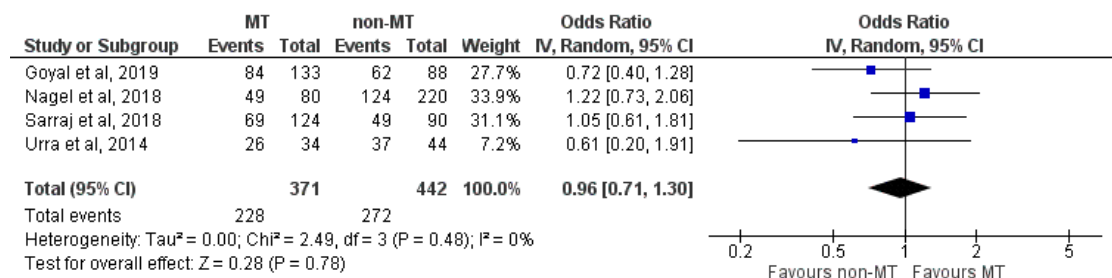

(B) With last-observation carried forward

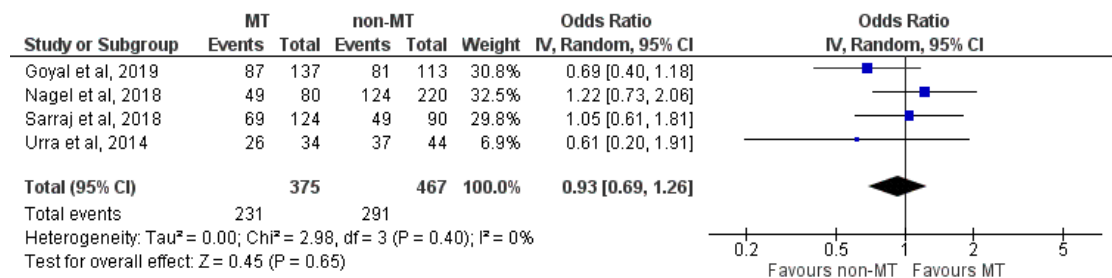



**eFigure 3.** Forest plots on the unadjusted probability of 3-month functional independence (mRS-scores 0-2) in patients with large vessel occlusion and mild neurological severity treated with mechanical thrombectomy compared to patients receiving best medical management.

(A) Without last-observation carried forward

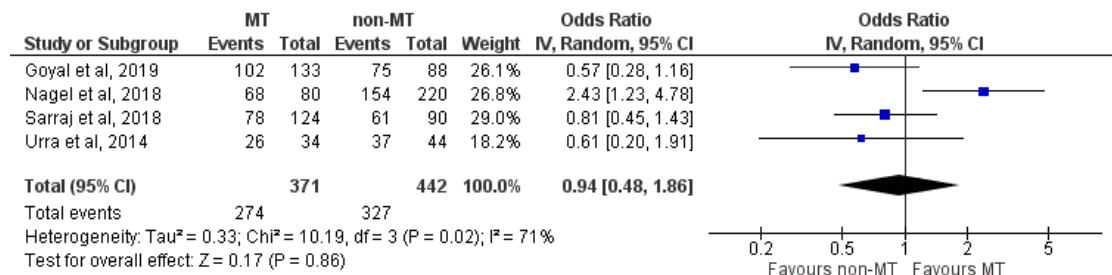

(B) With last-observation carried forward

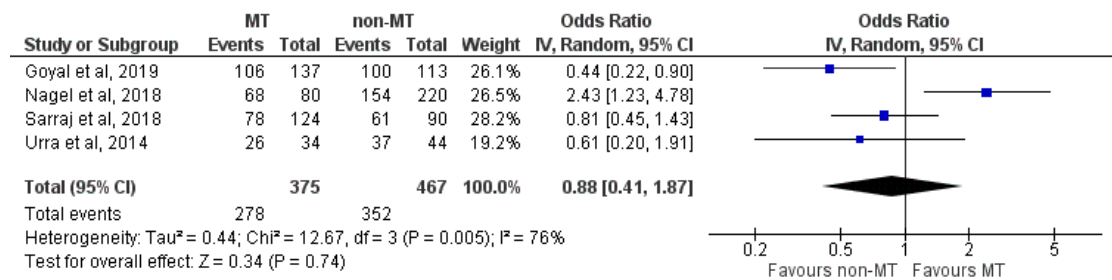

**eFigure 4.** Forest plots on the unadjusted probability of all-cause 3-month mortality in patients with large vessel occlusion and mild neurological severity treated with mechanical thrombectomy compared to patients receiving best medical management.

(A) Without last-observation carried forward

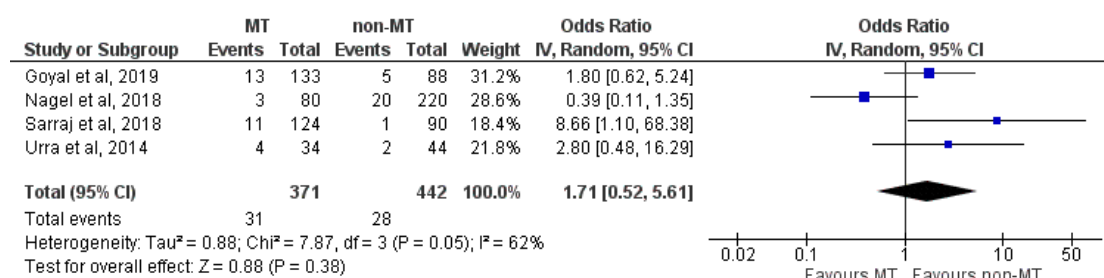

(B) With last-observation carried forward

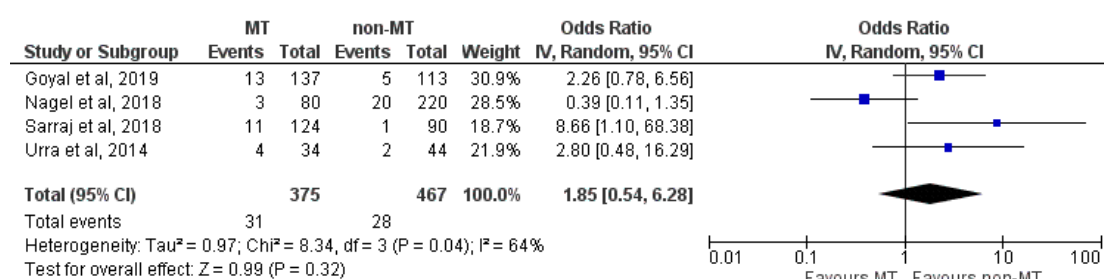

**eFigure 5.** Forest plot on the unadjusted probability of symptomatic intracranial hemorrhage in patients with large vessel occlusion and mild neurological severity treated with mechanical thrombectomy compared to patients receiving best medical management.

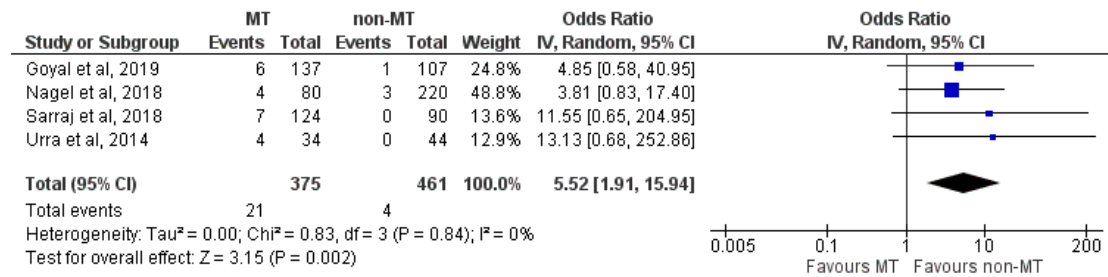

**eFigure 6.** Forest plot on the unadjusted probability of asymptomatic intracranial hemorrhage in patients with large vessel occlusion and mild neurological severity treated with mechanical thrombectomy compared to patients receiving best medical management.

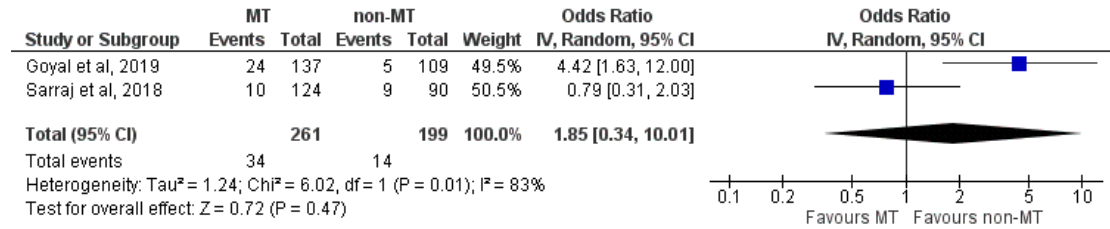

**eFigure 7.** Forest plot on the unadjusted probability of any intracranial hemorrhage in patients with large vessel occlusion and mild neurological severity treated with mechanical thrombectomy compared to patients receiving best medical management.

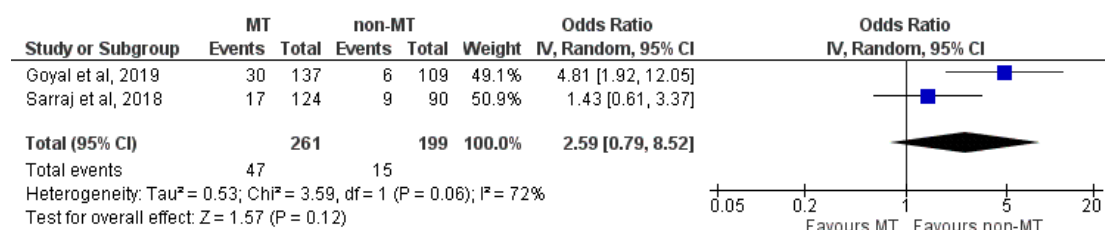

**eFigure 8.** Forest plots on the adjusted probability of 3-month favorable functional outcome (mRS-scores 0-1) in patients with large vessel occlusion and mild neurological severity treated with mechanical thrombectomy compared to patients receiving best medical management.

(A) Without last-observation carried forward

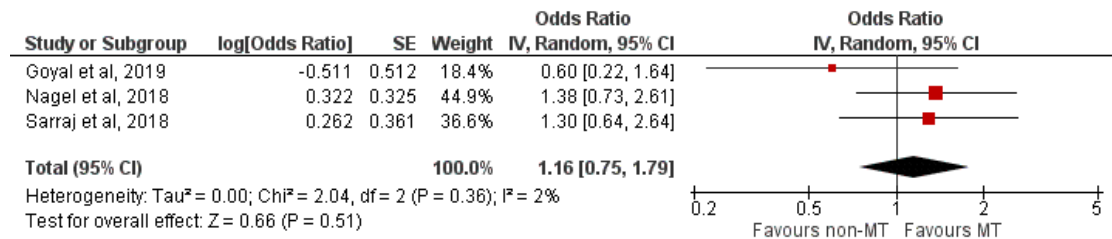

(B) With last-observation carried forward

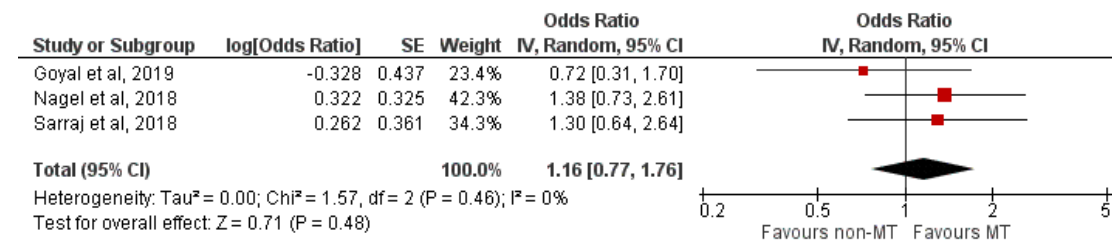

**eFigure 9.** Forest plots on the adjusted probability of 3-month functional independence (mRS-scores 0-2) in patients with large vessel occlusion and mild neurological severity treated with mechanical thrombectomy compared to patients receiving best medical management.

(A) Without last-observation carried forward

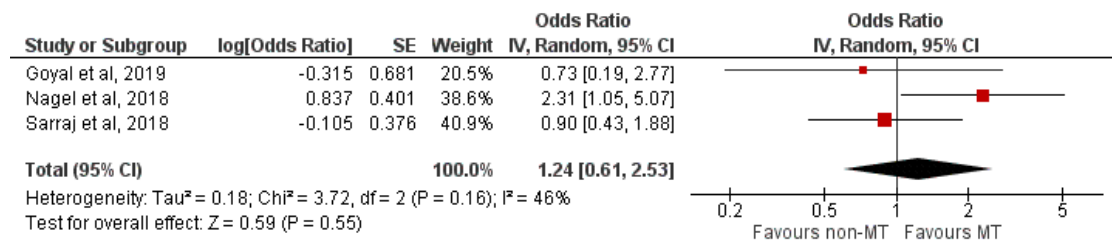

(B) With last-observation carried forward

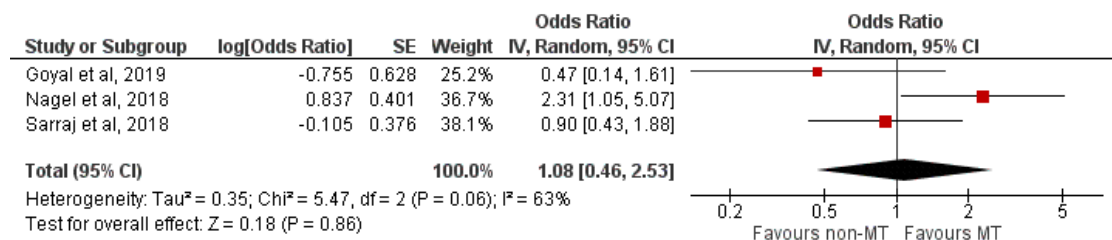

**eFigure 10.** Forest plots on the adjusted probability of all-cause 3-month mortality in patients with large vessel occlusion and mild neurological severity treated with mechanical thrombectomy compared to patients receiving best medical management.

(A) Without last-observation carried forward

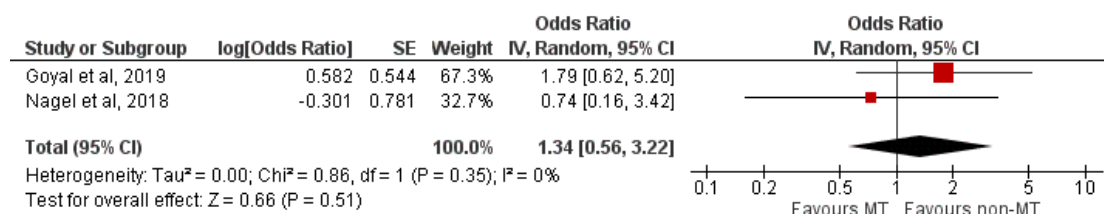

(B) With last-observation carried forward

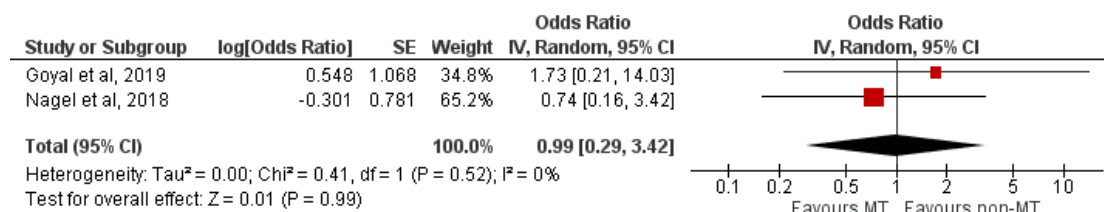



**eFigure 11.** Forest plot on the adjusted probability of symptomatic intracranial hemorrhage in patients with large vessel occlusion and mild neurological severity treated with mechanical thrombectomy compared to patients receiving best medical management.

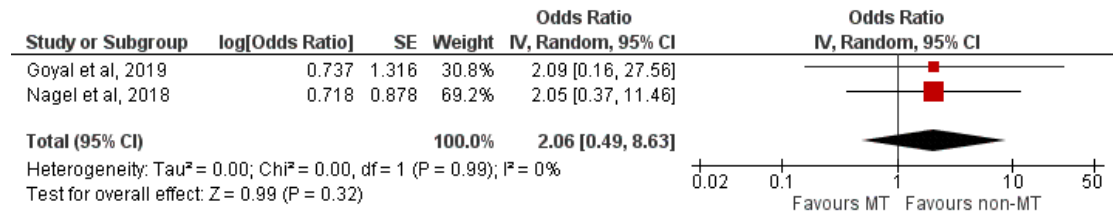

Supplement: jamaneurol-77-16-s001.pdf [file jamaneurol-77-16-s001.pdf]
